# Supplementary material
Source: MDPI journal article supplement (https://www.mdpi.com/2072-4292/15/19/4814)
Supplement: s1 [file s1]

**Table S1.** List of Landsat images used for interpretation

| Row number | 123/39   | 123/40   | 124/39   | 124/40   |
|------------|----------|----------|----------|----------|
| Data       | 19890211 | 19890211 | 19890210 | 19890210 |
|            | 19890307 | 19890307 | 19890517 | 19890517 |
|            | 19890814 | 19890510 | 19890906 | 19891125 |
|            | 19891118 | 19890814 | 19890922 | 19900402 |
|            | 19891204 | 19891102 | 19891024 | 19900520 |
|            | 19900427 | 19891118 | 19891125 | 19900605 |
|            | 19900716 | 19891204 | 19900418 | 19900723 |
|            | 19900902 | 19900427 | 19900504 | 19901128 |
|            | 19901223 | 19900716 | 19900605 | 19910115 |
|            | 19910108 | 19900902 | 19900723 | 19910624 |
|            | 19910516 | 19901207 | 19900824 | 19910726 |
|            | 19910703 | 19910516 | 19901128 | 19910827 |
|            | 19910719 | 19910601 | 19910115 | 19910928 |
|            | 19910820 | 19910719 | 19910523 | 19911030 |
|            | 19910921 | 19910810 | 19910624 | 19911115 |
|            | 19911007 | 19911007 | 19910827 | 19911201 |
|            | 19911023 | 19911108 | 19910928 | 19940107 |
|            | 19911108 | 19940508 | 19911031 | 19940123 |
|            | 19940305 | 19940727 | 19911115 | 19940429 |
|            | 19940508 | 19940812 | 19911201 | 19940702 |
|            | 19940727 | 19940913 | 19911217 | 19940803 |
|            | 19940812 | 19940929 | 19940107 | 19940904 |
|            | 19940929 | 19941031 | 19940123 | 19941022 |
|            | 19941031 | 19950204 | 19940429 | 19941107 |
|            | 19950204 | 19950409 | 19940702 | 19950227 |
|            | 19950409 | 19950612 | 19940803 | 19950721 |
|            | 19950527 | 19950628 | 19941022 | 19950907 |
|            | 19950628 | 19950714 | 19941107 | 19950923 |

---

|          |          |          |          |
|----------|----------|----------|----------|
| 19950714 | 19950831 | 19950227 | 19951025 |
| 19950831 | 19951002 | 19950603 | 19951110 |
| 19951205 | 19951205 | 19950721 | 19960301 |
| 19960106 | 19960106 | 19950806 | 19960317 |
| 19960310 | 19960207 | 19950907 | 19960520 |
| 19960614 | 19960310 | 19950923 | 19960621 |
| 19960817 | 19960513 | 19951025 | 19960707 |
| 19960902 | 19960614 | 19951110 | 19960723 |
| 19961004 | 19960817 | 19951228 | 19960808 |
| 19961020 | 19960902 | 19960301 | 19960925 |
| 19961207 | 19960918 | 19960317 | 19991020 |
| 19961223 | 19961004 | 19960520 | 19991223 |
| 19990927 | 19961020 | 19960621 | 20000312 |
| 20000727 | 19961207 | 19960707 | 20000328 |
| 20000913 | 19961223 | 19960808 | 20000515 |
| 20001031 | 19991114 | 19960925 | 20000531 |
| 20041127 | 19991130 | 19991207 | 20000616 |
| 20041213 | 20000727 | 19991223 | 20000904 |
| 20050114 | 20000913 | 20000312 | 20001107 |
| 20050303 | 20001031 | 20000328 | 20041102 |
| 20050404 | 20041213 | 20000413 | 20041118 |
| 20050420 | 20050114 | 20000515 | 20050222 |
| 20050506 | 20050404 | 20000616 | 20050513 |
| 20050623 | 20050420 | 20000904 | 20050529 |
| 20050911 | 20050506 | 20001006 | 20050614 |
| 20090906 | 20050623 | 20001107 | 20050630 |
| 20091125 | 20050725 | 20001123 | 20050716 |
| 20101112 | 20050911 | 20041118 | 20050801 |
| 20101230 | 20051029 | 20041204 | 20051121 |
| 20150331 | 20091024 | 20050222 | 20100220 |

---

---

|          |          |          |          |
|----------|----------|----------|----------|
| 20150416 | 20091125 | 20050310 | 20100730 |
| 20150619 | 20100621 | 20050614 | 20100831 |
| 20150721 | 20100808 | 20050630 | 20101119 |
| 20150806 | 20101112 | 20050801 | 20101205 |
| 20150822 | 20101230 | 20050918 | 20101221 |
| 20150907 | 20141022 | 20051121 | 20141114 |
| 20151025 | 20150331 | 20100730 | 20141130 |
| 20151126 | 20150416 | 20100831 | 20150117 |
| 20191207 | 20150721 | 20101205 | 20150509 |
| 20200124 | 20150806 | 20101221 | 20150712 |
| 20200209 | 20150822 | 20150101 | 20150728 |
| 20200225 | 20150907 | 20150117 | 20150829 |
| 20200413 | 20151025 | 20150322 | 20151016 |
| 20200429 | 20151126 | 20150509 | 20191214 |
| 20200702 | 20151020 | 20150712 | 20200131 |
| 20200803 | 20191105 | 20150728 | 20200216 |
| 20200819 | 20191207 | 20150829 | 20200319 |
| 20201225 | 20200108 | 20150914 | 20200420 |
|          | 20200209 | 20151016 | 20200826 |
|          | 20200413 | 20151101 | 20201114 |
|          | 20200429 | 20151117 |          |
|          | 20200616 | 20191230 |          |
|          | 20200803 | 20200131 |          |
|          | 20201022 | 20200216 |          |
|          | 20201123 | 20200319 |          |
|          |          | 20200810 |          |
|          |          | 20201029 |          |
|          |          | 20201130 |          |

---

Note: The remote sensing image data from 1989 to 2010 were Landsat TM, and the image from 2015 to 2020 were Landsat OLI.

**Table S2.** List of MOD13Q1 remote sensing images used in this paper

| Row number | Data                                              |
|------------|---------------------------------------------------|
| h27v06     | 2000-2001、2004-2006、2009-2011、2014-2016、2019-2020 |

**Table S3.** Accuracy assessment of main crop spatial distribution maps in 1990–2020 in comparison with statistical data.

| Types                |    | 1995   | 2000   | 2005   | 2010   | 2015   | 2020   |
|----------------------|----|--------|--------|--------|--------|--------|--------|
| Single rice          | SA | 1.08   | 1.36   | 1.10   | 1.74   | 1.33   | 1.20   |
|                      | RE | −15.58 | −14.21 | 16.43  | −11.35 | −16.05 | −11.63 |
| Double-cropping rice | SA | 2.77   | 1.41   | 1.39   | 1.21   | 2.02   | 1.17   |
|                      | RE | 17.58  | 16.05  | −14.81 | −13.31 | −15.35 | −14.55 |

Notes: SA is the statistical area and its unit is millions of hectares. RE is the relative error and is expressed as a percentage.

Double-cropping rice planting area is the sum of early rice and late rice planting areas. Due to problems in obtaining statistical data, this table did not include the statistical data in 1990.

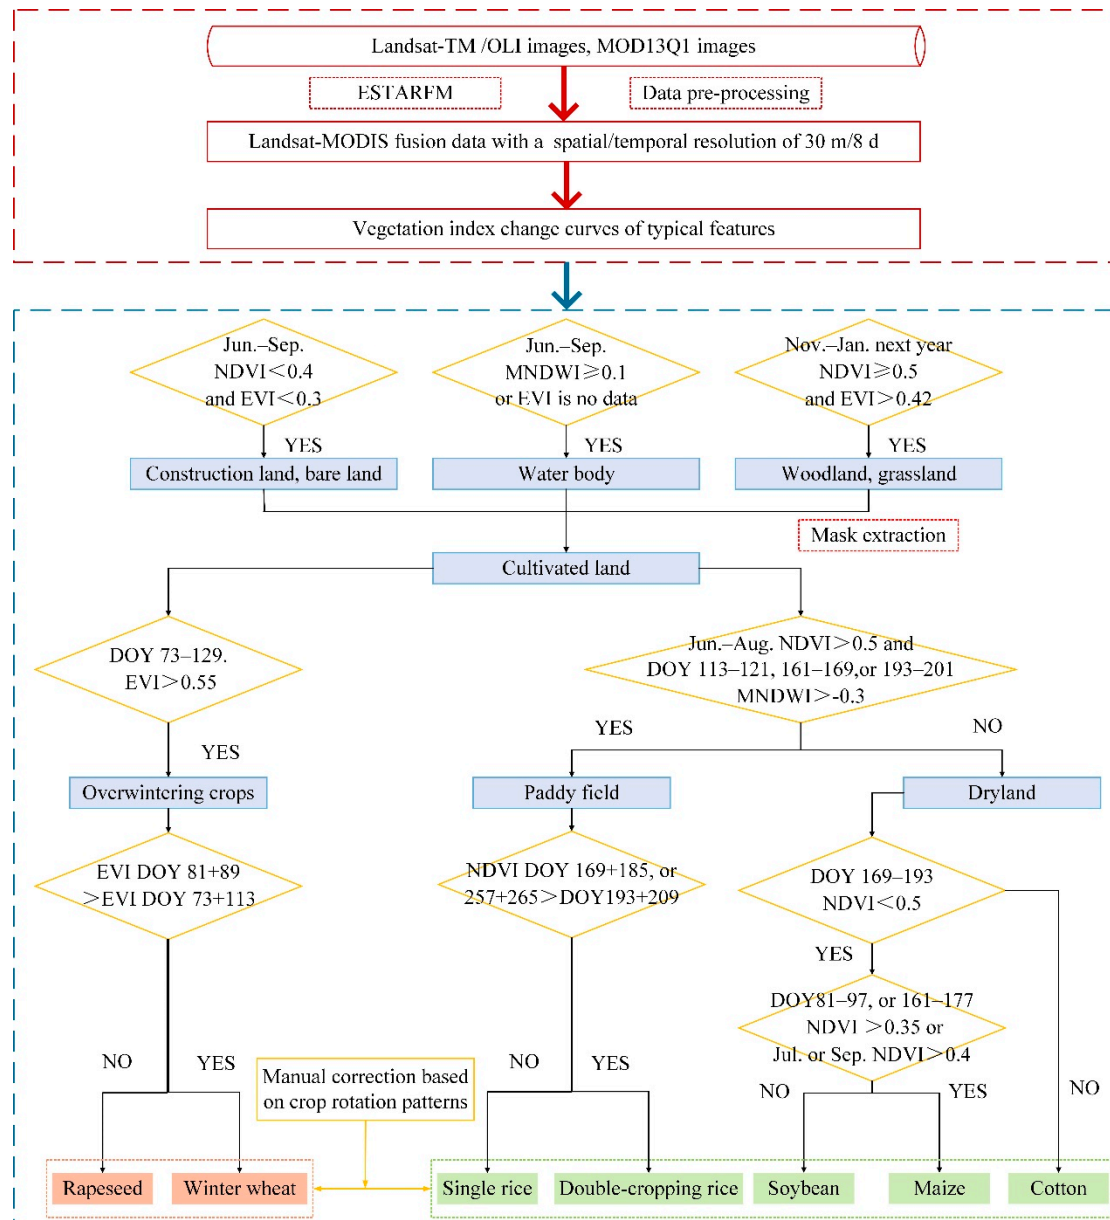

Figure S1. Flowchart of rice extraction based on phenological vegetation index

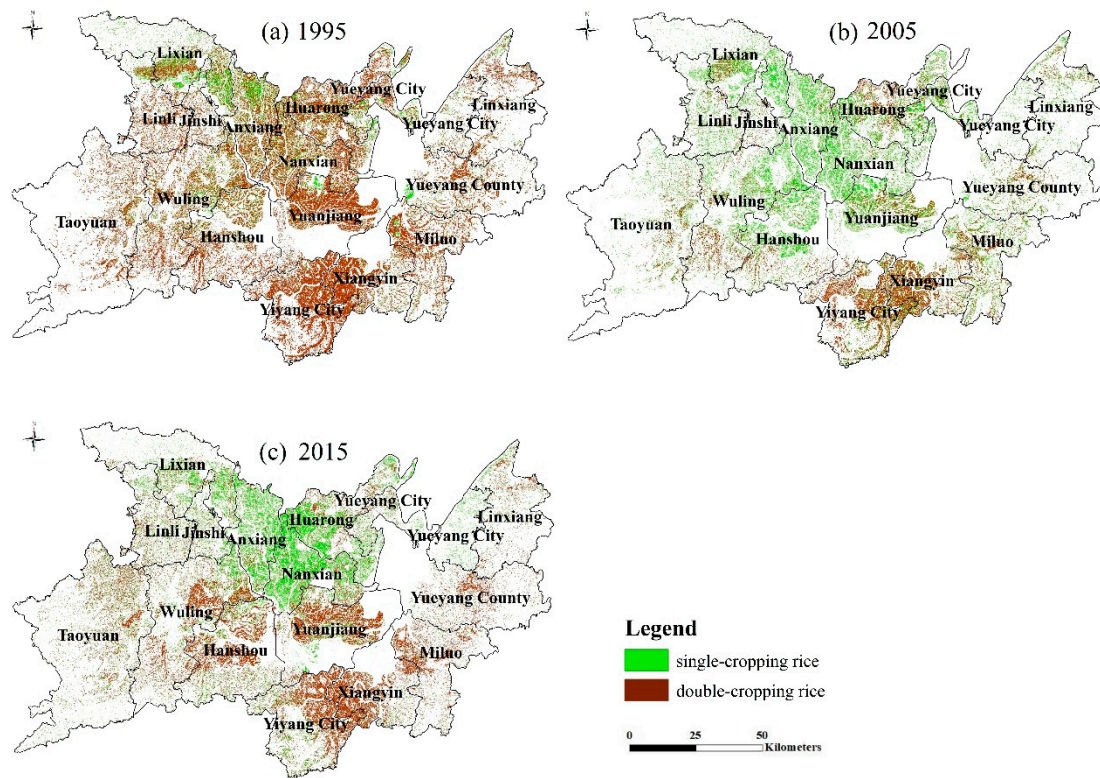

Figure S2. Spatial distribution of rice planting in the DTLP: (a) 1995; (b) 2005; (c) 2015.

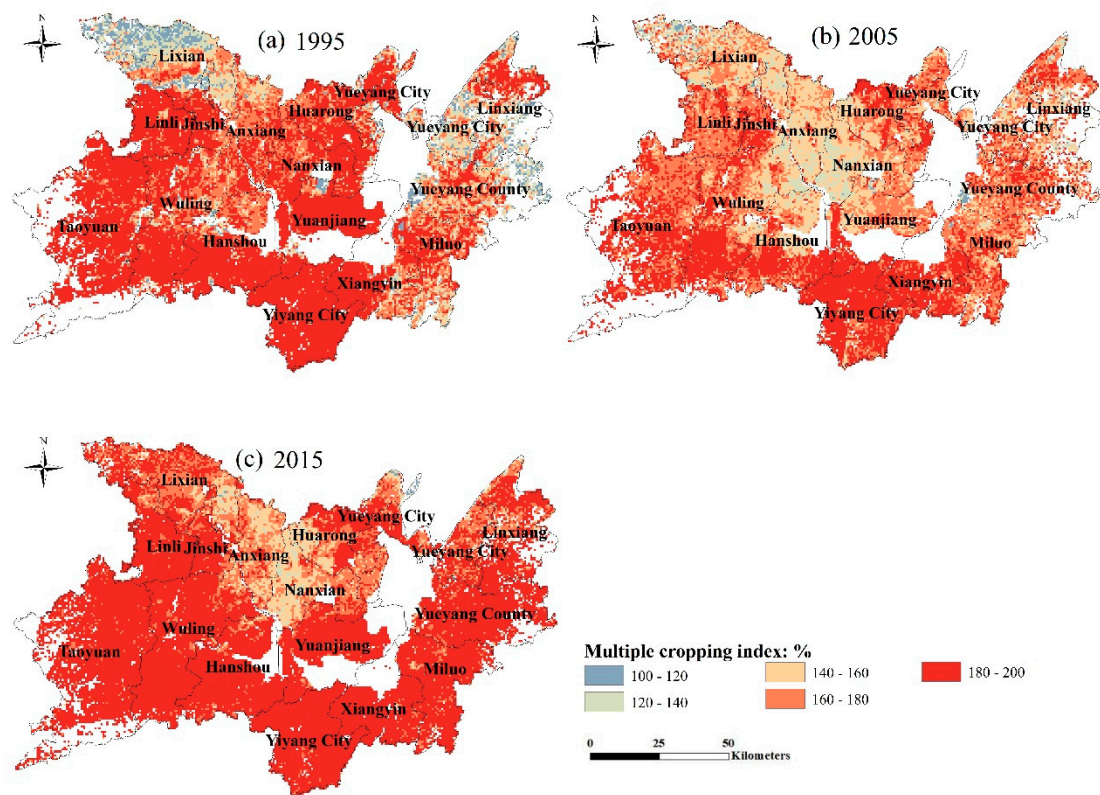

Figure S3. Spatial distribution of rice multiple-crop index (MCI) in the DTLP based on 1km×1km grid: (a) 1995; (b) 2005; (c) 2015.



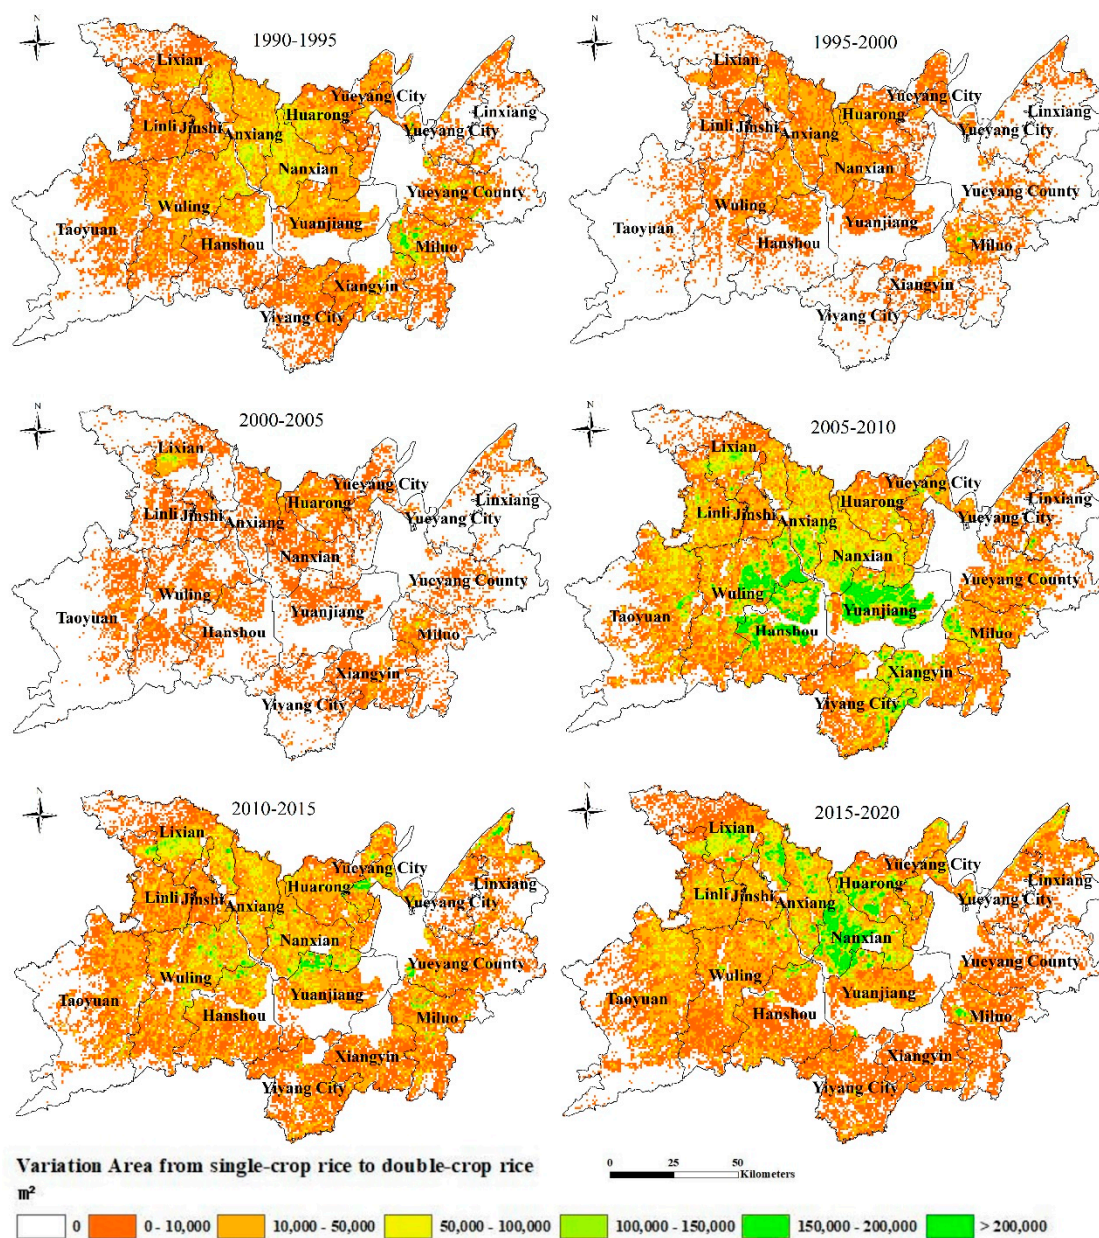

Figure S4. Spatial distribution of planting area of single-cropping rice to double-cropping rice.
